# Supplementary material for: Effects of Different Irrigation Rates on Remontant Strawberry Cultivars Grown in Soil
Source: MDPI journal article supplement (doi:10.3390/horticulturae9091026), 2023-09-11
Supplement: s1 [file s1]

# Supplementary materials

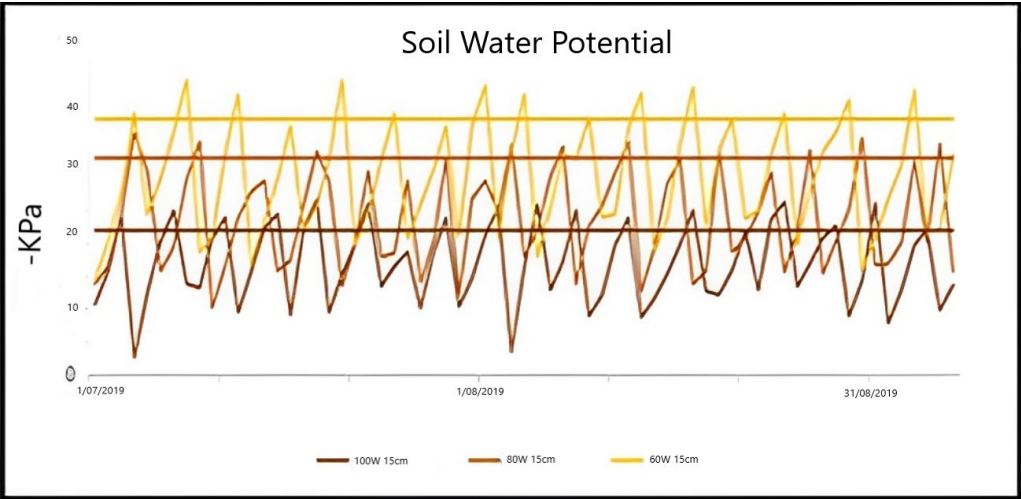

Figure S1. Soil water potential calculated by the tensiometers.

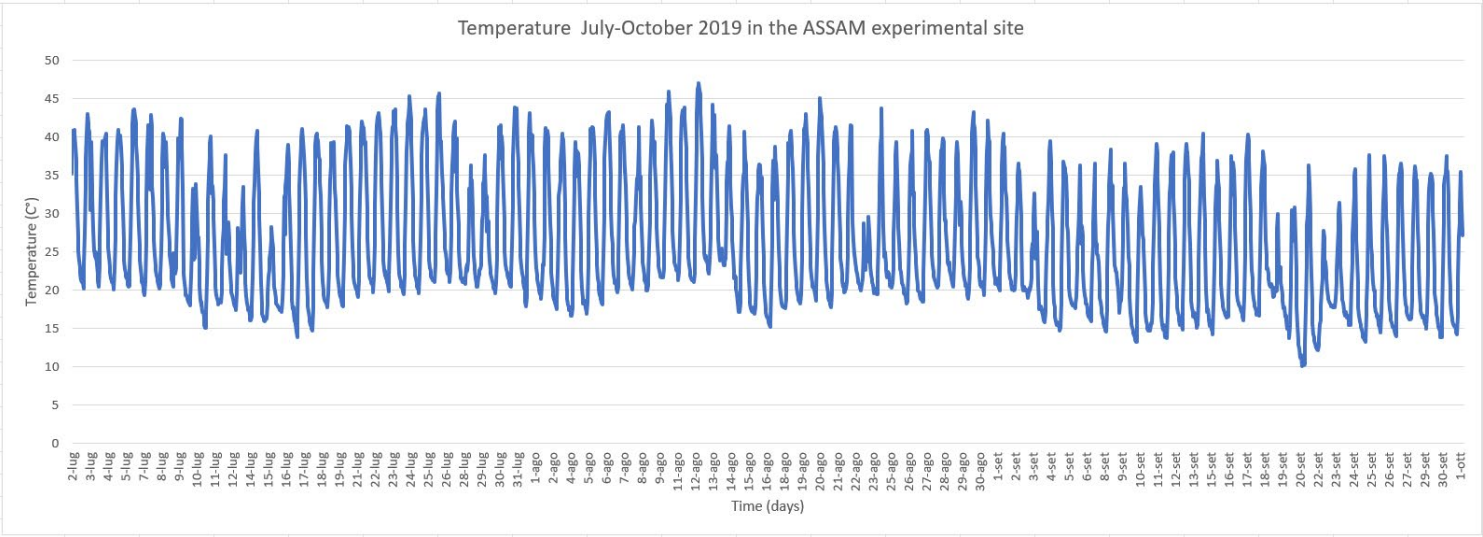

Figure S2. Temperature from July 2019 until October 2019 in the ASSAM experimental field

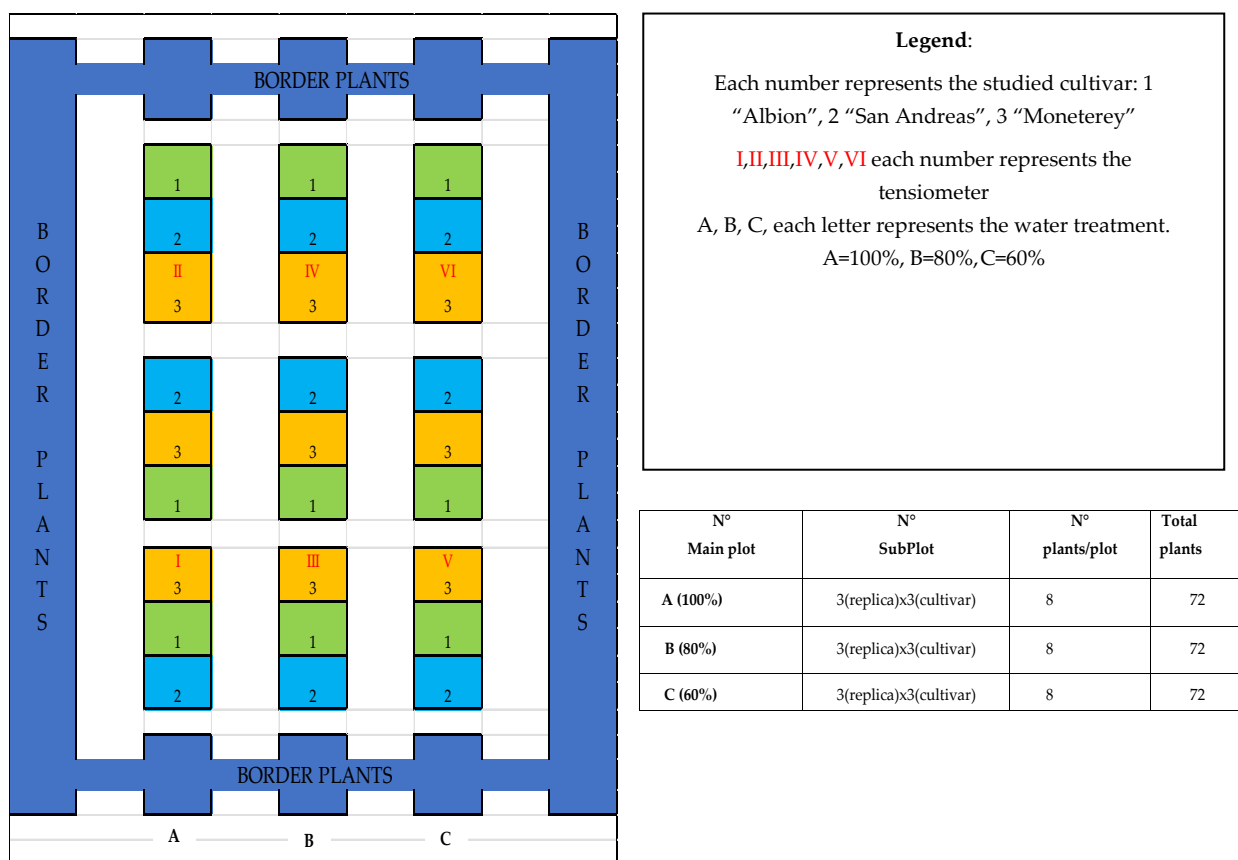

**Figure S3.** Experimental design of the trial
